# Supplementary material
Source: PubMed Central journal article supplement (PMC3946352)
Supplement: NIHMS533228-supplement-Supp_Table_S1-S2.pdf [file NIHMS533228-supplement-Supp_Table_S1-S2.pdf]

**Supp. Table S1. Mutagenic primers used to generate HA-tagged variant *ZIC3* expression constructs**

| <b>Variant</b>                                        | <b>Forward Primer Sequence</b>                                                | <b>Reverse Primer Sequence</b>                                                |
|-------------------------------------------------------|-------------------------------------------------------------------------------|-------------------------------------------------------------------------------|
| p.Asp6GlufsX32<br>(c.18_19delinsA)                    | 5'-<br>ACCCATGACGATGCTCCTGGAAGA<br>GGCCCGCAGTTCCTGGGC-3'                      | 5'-<br>GCCCAGGGAAGTGC GGGCCTCTTCC<br>AGGAGCATCGTCATGGGT-3'                    |
| p.Gly17Cys<br>(c.49G>T)                               | 5'-<br>GGGCTGGGAGTGTGCAGCTTCGGC<br>G-3'                                       | 5'-<br>CGCCGAAGCTGCACACTCCCAGCCC-<br>3'                                       |
| p.Ala50ProfsX9<br>(c.148delG)                         | 5'-<br>CACGCCGCCGCCGCCCGCCGCCG<br>CCGCTGCC-3'                                 | 5'-<br>GGCAGCGGCCGGCGGGGGCGGCG<br>GCGGCGTG-3'                                 |
| p.Ala53dup<br>(c.157_159dupGCC)                       | 5'-<br>ACTCAACCCACGCCGCCGCCGCCG<br>CCGCCGCCGCCGCTGCCTTCA<br>AGCTGAGC-3'       | 5'-<br>GCTCAGCTTGAAGGCAGCGGCGGCG<br>GCGGCGGCGGCGGCGGCGGCGTGG<br>GTTGAGT-3'    |
| p.Ala52_Ala53dup<br>(c.154_159dupGCCGCC)              | 5'-<br>ACTCAACCCACGCCGCCGCCGCCG<br>CCGCCGCCGCCGCTGCCGCCGCCT<br>TCAAGCTGAGC-3' | 5'-<br>GCTCAGCTTGAAGGCGGCGGCAGCG<br>GCGGCGGCGGCGGCGGCGGCGGCG<br>TGGGTTGAGT-3' |
| p.Ser109Cys<br>(c.326C>G)                             | 5'-<br>ACGGTGGCGCTGCCTGTGCCGCCT-<br>3'                                        | 5'-<br>AGGCGGCACAGGCAGCGCCACCGT -<br>3'                                       |
| p.Glu155X<br>(c.G463T)                                | 5'-<br>GCTGGCATCCCCTAGCCCCCTAGC<br>T-3'                                       | 5'-<br>AGCTAGGGGGCTAGGGGATGCCAGC<br>-3'                                       |
| p.Tyr199delfsX19<br>(c.595-610del<br>TACCGCCAGTGGCCA) | 5'-<br>GGCCGTGCTGACCCAGCCCGCGC-<br>3'                                         | 5'-GCGCGGGCTGGGTCAGCACGGCC-<br>3'                                             |
| p.Ser252X<br>(c.755C>A)                               | 5'-<br>ATCAAGCAGGAGCTGTAGTGCAAG<br>TGGATCGAC-3'                               | 5'-<br>GTCGATCCACTTGC ACTACAGCTCCT<br>GCTTGAT-3'                              |

| <b>Variant</b>                  | <b>Forward Primer Sequence</b>                    | <b>Reverse Primer Sequence</b>                     |
|---------------------------------|---------------------------------------------------|----------------------------------------------------|
| p.Glu291GlyfsX53<br>(c.866dupG) | 5'-<br>GCATGTGGGGGGGCCCCGGAGCAG<br>AA-3'          | 5'-<br>TTCTGCTCCGGGCCCCCCCACATGC-<br>3'            |
| p.His318Asn<br>(c.952C>A)       | 5'-<br>AGTACAAACTGGTCAACAACATCC<br>GAGTGCACACG-3' | 5'-<br>CGTGTGCACTCGGATGTTGTTGACC<br>AGTTTGTACT-3'  |
| p.Arg350Gly<br>(c.1048A>G)      | 5'-<br>CTCAAGATCCACAAGGGGACCCAC<br>ACAGGTG-3'     | 5'-<br>CACCTGTGTGGGTCCCCTTGTGGATC<br>TTGAG-3'      |
| p.Ser402Pro<br>(c.1204T>C)      | 5'-<br>ACGCACCCGAGCCCCCTGCGCAAA<br>C-3'           | 5'-<br>GTTTGCGCAGGGGGCTCGGGTTCGT-<br>3'            |
| p.Ala447Gly<br>(c.1340C>G)      | 5'-<br>CACTAAAACCCCTTCTGGAGTTCA<br>AACTAGCACCA-3' | 5'-<br>TGGTGCTAGTTTGA ACTCCAGAAGG<br>GGTTTTAGTG-3' |

**Supp. Table S2. Phenotypic summary of ZIC3 variant carriers relative to the 440 patient heterotaxy and CHD cohort**

|                                      | Heterotaxy Cohort |           | ZIC3 Mutation Cohort |          | Non-Mutation Cohort |           | p-value <sup>1</sup> |
|--------------------------------------|-------------------|-----------|----------------------|----------|---------------------|-----------|----------------------|
|                                      | n                 | % (n/440) | n                    | % (n/15) | n                   | % (n/425) |                      |
| <b>Overall Phenotype:</b>            |                   |           |                      |          |                     |           |                      |
| Situs Inversus totalis               | 47                | 10.68     | 1                    | 6.67     | 46                  | 10.82     | NS, p = 1.000        |
| Heterotaxy                           | 248               | 56.36     | 8                    | 53.33    | 240                 | 56.47     | NS, p = 0.7895       |
| Isolated CHD                         | 117               | 26.59     | 5                    | 33.33    | 112                 | 26.35     | NS, p = 0.5570       |
| VACTERL-spectrum                     | 28                | 6.36      | 1                    | 6.67     | 27                  | 6.35      | NS, p = 1.000        |
| <b>Abdomen/gastrointestinal:</b>     |                   |           |                      |          |                     |           |                      |
| Abdominal Situs Inversus             | 129               | 29.32     | 3                    | 20.00    | 126                 | 29.65     | NS, p = 0.5688       |
| Bile duct hypoplasia/biliary atresia | 7                 | 1.59      | 0                    | 0.00     | 7                   | 1.65      | NS, p = 1.000        |
| Gallbladder abnormalities            | 10                | 2.27      | 0                    | 0.00     | 10                  | 2.35      | NS, p = 1.000        |
| Malrotation of the gut               | 93                | 21.14     | 2                    | 13.33    | 91                  | 21.41     | NS, p = 0.7472       |
| Asplenia                             | 112               | 25.45     | 3                    | 20.00    | 109                 | 25.65     | NS, p = 0.7696       |
| Polysplenia                          | 46                | 10.45     | 1                    | 6.67     | 45                  | 10.59     | NS, p = 1.000        |
| Multilobated spleen                  | 1                 | 0.23      | 0                    | 0.00     | 1                   | 0.24      | NS, p = 1.000        |
| HJ bodies                            | 1                 | 0.23      | 0                    | 0.00     | 1                   | 0.24      | NS, p = 1.000        |
| Imperforate anus                     | 14                | 3.18      | 0                    | 0.00     | 14                  | 3.29      | NS, p = 1.000        |
| Renal anomalies                      | 24                | 5.45      | 0                    | 0.00     | 24                  | 5.65      | NS, p = 1.000        |
| Liver anomalies                      | 24                | 5.45      | 1                    | 6.67     | 23                  | 5.41      | NS, p = 0.5749       |
| <b>Skeletal/limbs</b>                |                   |           |                      |          |                     |           |                      |
| Vertebral anomalies                  | 33                | 7.50      | 0                    | 0.00     | 33                  | 7.76      | NS, p = 0.6165       |
| Rib anomalies                        | 14                | 3.18      | 0                    | 0.00     | 14                  | 3.29      | NS, p = 1.000        |
| Scoliosis                            | 12                | 2.73      | 0                    | 0.00     | 12                  | 2.82      | NS, p = 1.000        |
| Limb defects                         | 7                 | 1.59      | 1                    | 6.67     | 6                   | 1.41      | NS, p = 0.2169       |
| <b>Cardiac position:</b>             |                   |           |                      |          |                     |           |                      |
| Levocardia                           | 323               | 73.41     | 11                   | 73.33    | 312                 | 73.41     | NS, p = 1.000        |
| Mesocardia                           | 14                | 3.18      | 0                    | 0.00     | 14                  | 3.29      | NS, p = 1.000        |
| Dextrocardia                         | 103               | 23.41     | 4                    | 26.67    | 99                  | 23.29     | NS, p = 0.7588       |
| <b>Atria:</b>                        |                   |           |                      |          |                     |           |                      |
| Common atrium                        | 13                | 2.95      | 0                    | 0.00     | 13                  | 3.06      | NS, p = 1.000        |
| Atrial isomerism                     | 9                 | 2.05      | 0                    | 0.00     | 9                   | 2.12      | NS, p = 1.000        |
| ASD                                  | 132               | 30.00     | 6                    | 40.00    | 126                 | 29.65     | NS, p = 0.3982       |
| AV canal                             | 98                | 22.27     | 3                    | 20.00    | 95                  | 22.35     | NS, p = 1.000        |
| <b>Ventricles:</b>                   |                   |           |                      |          |                     |           |                      |
| Single ventricle                     | 67                | 15.23     | 3                    | 20.00    | 64                  | 15.06     | NS, p = 0.7115       |
| VSD                                  | 176               | 40.00     | 8                    | 53.33    | 168                 | 39.53     | NS, p = 0.2960       |
| <b>Vessels:</b>                      |                   |           |                      |          |                     |           |                      |

|                 |    |       |   |       |    |       |                |
|-----------------|----|-------|---|-------|----|-------|----------------|
| SVC abnormality | 83 | 18.86 | 1 | 6.67  | 82 | 19.29 | NS, p = 0.3226 |
| IVC abnormality | 93 | 21.14 | 1 | 6.67  | 92 | 21.65 | NS, p = 0.2113 |
| TAPVR           | 63 | 14.32 | 1 | 6.67  | 62 | 14.59 | NS, p = 0.7066 |
| PAPVR           | 20 | 4.55  | 2 | 13.33 | 18 | 4.24  | NS, p = 0.1446 |

**Great arteries/conotruncal:**

|                           |     |       |   |       |     |       |                      |
|---------------------------|-----|-------|---|-------|-----|-------|----------------------|
| Aortic arch abnormalities | 87  | 19.77 | 2 | 13.33 | 85  | 20.00 | NS, p = 0.7455       |
| d-TGA                     | 116 | 26.36 | 5 | 33.33 | 111 | 26.12 | NS, p = 0.5546       |
| l-TGA                     | 40  | 9.09  | 1 | 6.67  | 39  | 9.18  | NS, p = 1.000        |
| DILV                      | 17  | 3.86  | 1 | 6.67  | 16  | 3.76  | NS, p = 0.4517       |
| DORV                      | 114 | 25.91 | 2 | 13.33 | 112 | 26.35 | NS, p = 0.3730       |
| PA                        | 71  | 16.14 | 6 | 40.00 | 65  | 15.29 | <b>S, p = 0.0215</b> |
| PS                        | 78  | 17.73 | 2 | 13.33 | 76  | 17.88 | NS, p = 1.000        |
| AS                        | 11  | 2.50  | 0 | 0.00  | 11  | 2.59  | NS, p = 1.000        |
| CoA                       | 28  | 6.36  | 0 | 0.00  | 28  | 6.59  | NS, p = 0.6129       |
| TOF                       | 9   | 2.05  | 0 | 0.00  | 9   | 2.12  | NS, p = 1.000        |
| BAV                       | 5   | 1.14  | 0 | 0.00  | 5   | 1.18  | NS, p = 1.000        |

<sup>1</sup> p-values for statistical significance ( $p < 0.05$ ) represent comparisons between *ZIC3* mutation and non-mutation cohorts by two-tailed Fischer's Exact tests using Graphpad Instat v.3 software. NS = non-significant, S = significant.

**Abbreviations:** AS = aortic stenosis; ASD = atrial septal defect; CAVC = complete atrioventricular canal; BAV = bicuspid aortic valve; CHD = congenital heart disease; CoA = coarctation of the aorta; d-TGA = dextro-transposition of the great arteries; DILV = double inlet right ventricle; DORV = double outlet right ventricle; HJ bodies = Howell-Jolly bodies; IVC = inferior vena cava; l-TGA = levo-transposition of the great arteries; PA = pulmonary atresia; PAPVR = partial anomalous pulmonary venous return; PS = pulmonic stenosis, including sub, valvar, and supra-valvar but not branch PS; SVC = superior vena cava; TAPVR = total anomalous pulmonary venous return; TOF = Tetralogy of Fallot; VACTERL = vertebral, anal, cardiac, tracheo-esophageal, renal, radial, limb; VSD = ventricular septal defect
